# Supplementary material
Source: ML conference proceedings conference paper supplement (https://proceedings.neurips.cc/paper_files/paper/2020/hash/3493894fa4ea036cfc6433c3e2ee63b0-Abstract.html)
Supplement: Supplementary file [file 3493894fa4ea036cfc6433c3e2ee63b0-Supplemental.pdf]

---

# Supplementary for HOI Analysis: Integrating and Decomposing Human-Object Interaction

---

Yong-Lu Li\*   Xinpeng Liu\*   Xiaoqian Wu   Yizhuo Li   Cewu Lu†  
Shanghai Jiao Tong University  
yonglu\_li@sjtu.edu.cn, xinpengliu0907@gmail.com, enlighten@sjtu.edu.cn  
liyizhuo@sjtu.edu.cn, lucewu@sjtu.edu.cn

## 1 Visualized Results

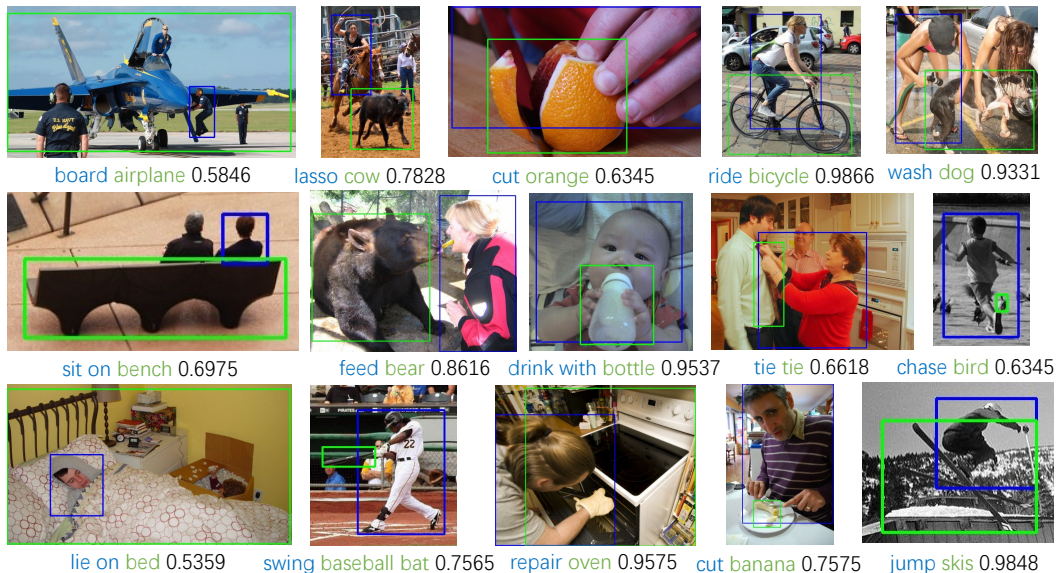

Figure 1: Some HOI detection results on HICO-DET [1].

We visualize some HOI detection results of our IDN on HICO-DET [1] in Fig. 1. As shown, IDN is able to decompose and integrate various HOIs in diverse scenes and accurately detect them.

## 2 Result Analysis

We illustrate the detailed comparison between our method, Peyre *et al.* [3] and DJ-RN [2] on Rare set on HICO-DET [1] in Fig. 2. We can find that our IDN outperforms Peyre *et al.* [3] and DJ-RN [2] on various rare HOIs. The effectiveness of our IDN on Rare set proves that the dynamically learned interaction representation can greatly alleviate the data deficiency of the rare HOIs.

---

\*The first two authors contribute equally.

†Cewu Lu is the corresponding author, member of Qing Yuan Research Institute and MoE Key Lab of Artificial Intelligence, AI Institute, Shanghai Jiao Tong University, China.

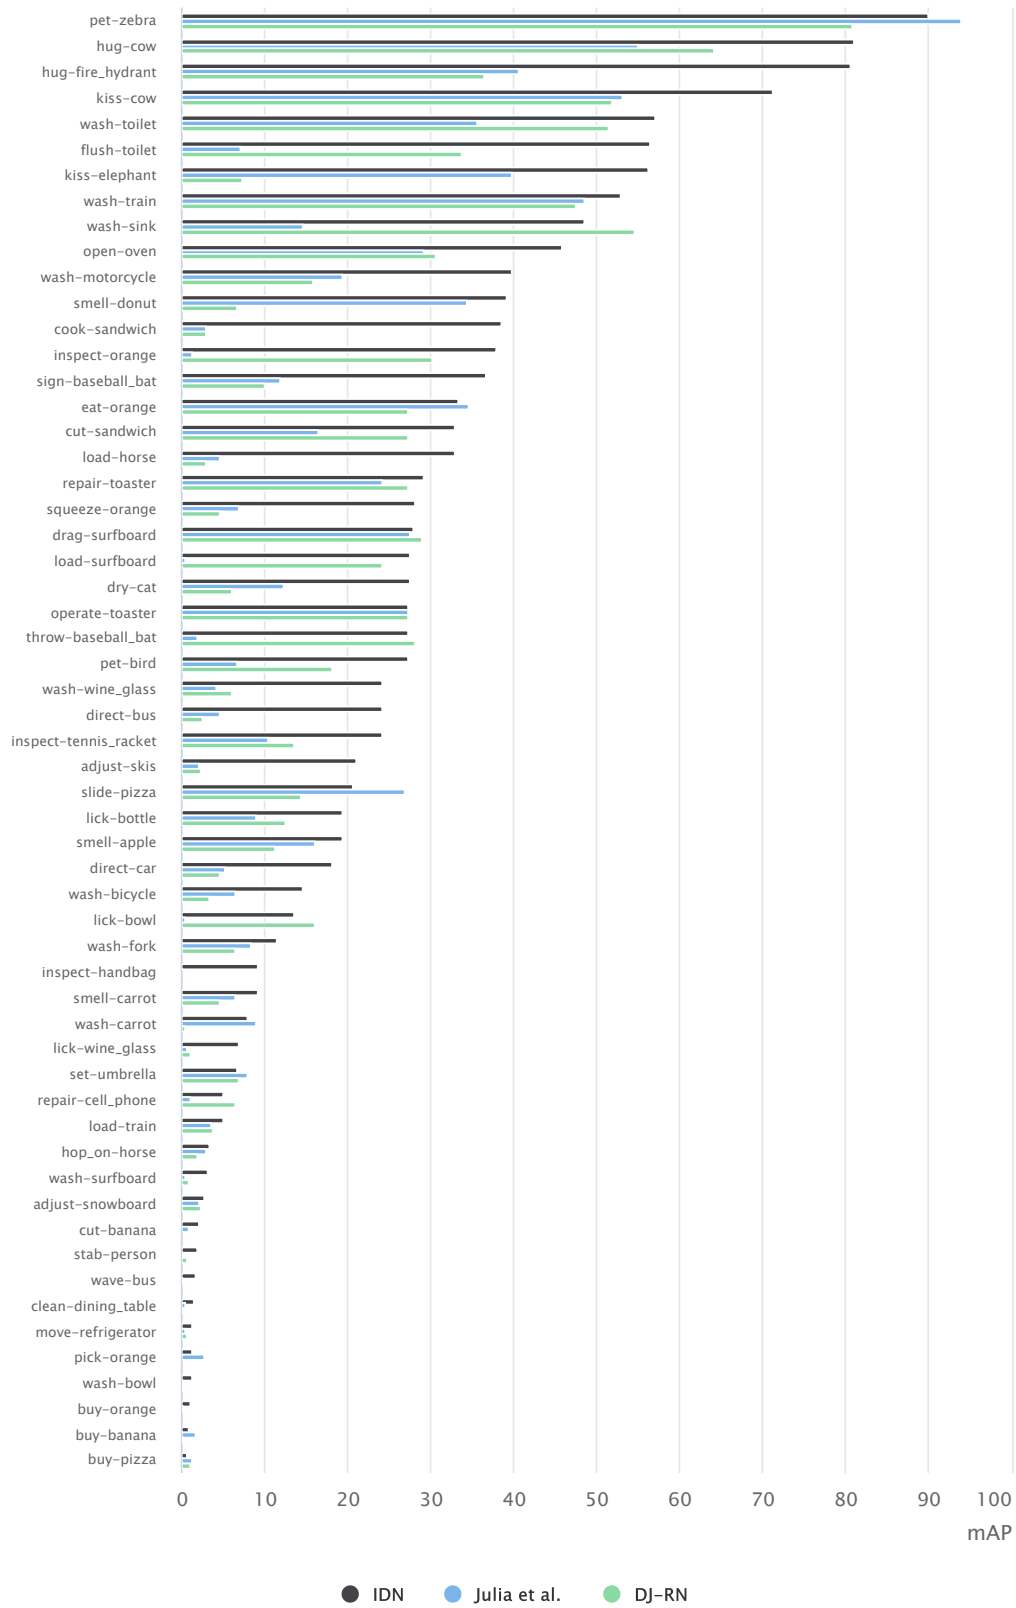

Figure 2: Performance comparison between our method, Peyre *et al.* [3] and DJ-RN [2] on Rare set of HICO-DET [1].

### 3 Code

We provide our source code in [https://github.com/DirtyHarryLYL/HAKE-Action-Torch/tree/IDN-\(Integrating-Decomposing-Network\)](https://github.com/DirtyHarryLYL/HAKE-Action-Torch/tree/IDN-(Integrating-Decomposing-Network)) under our project HAKE-Action-Torch (<https://github.com/DirtyHarryLYL/HAKE-Action-Torch>).

### References

- [1] Yu-Wei Chao, Yunfan Liu, Xieyang Liu, Huayi Zeng, and Jia Deng. Learning to detect human-object interactions. In *WACV*, 2018.
- [2] Yong-Lu Li, Xinpeng Liu, Han Lu, Shiyi Wang, Junqi Liu, Jiefeng Li, and Cewu Lu. Detailed 2d-3d joint representation for human-object interaction. In *CVPR*, 2020.
- [3] Julia Peyre, Ivan Laptev, Cordelia Schmid, and Josef Sivic. Detecting rare visual relations using analogies. In *ICCV*, 2019.
